# Supplementary material for: Transcriptome analysis unravels spatiotemporal modulation of phytohormone-pathway expression underlying gibberellin-induced parthenocarpic fruit set in San Pedro-type fig (Ficus carica L.)
Source: PubMed Central journal article supplement (PMC5984833; doi:10.1186/s12870-018-1318-1), 2018-06-01

**Transcriptome analysis unravels spatiotemporal modulation of  
phytohormone-pathway expression underlying gibberellin-induced  
parthenocarpic fruit set in San Pedro-type fig (*Ficus carica* L.)**

Lijuan Chai<sup>1†</sup>, Peng Chai<sup>1†</sup>, Shangwu Chen<sup>2</sup>, Moshe A. Flaishman<sup>3</sup>, Huiqin Ma<sup>1\*</sup>

<sup>1</sup>College of Horticulture, China Agricultural University, Beijing, P.R. China

<sup>2</sup>College of Beijing Laboratory for Food Quality and Safety, College of Food Science  
and Nutritional Engineering, China Agricultural University, Beijing, P.R. China

<sup>3</sup>Department of Fruit Tree Sciences, Agricultural Research Organization, Volcani  
Center, Bet-Dagan, Israel

Lijuan Chai: clj2010@cau.edu.cn

Peng Chai: chaipeng@cau.edu.cn

Shangwu Chen: swchen@cau.edu.cn

Moshe A. Flaishman: vhmoshea@volcani.agri.gov.il

Huiqin Ma: hqma@cau.edu.cn

\*Correspondence: Huiqin Ma, hqma@cau.edu.cn

†These authors contributed equally to this work

**Table S1** Primer sequences of genes used for validation of RNA-Seq results by quantitative real-time PCR

| <b>Gene ID</b>   | <b>Annotation in NR database</b>                                             | <b>Forward primer (5'→3')</b> | <b>Reverse primer (5'→3')</b> |
|------------------|------------------------------------------------------------------------------|-------------------------------|-------------------------------|
| comp12280_c<br>0 | gi:587835799/auxin-induced protein IAA4<br>[ <i>Morus notabilis</i> ]        | CGGATCTGCCACACTTACTGCT        | ACGCTGATCACGAGGACCAC          |
| comp16786_c<br>0 | gi:587939152/auxin-induced protein AUX22<br>[ <i>Morus notabilis</i> ]       | AGCATCCAGTCTCCGTCT            | ATTCGGATCTTGCAATGGCTT         |
| comp29694_c<br>0 | gi:587887925/hypothetical protein<br>L484_011493 [ <i>Morus notabilis</i> ]  | ACCTTTGTCCAGCCCCGGAAC         | CCGACCGCGAAACCTACAAGTCC<br>A  |
| comp57463_c<br>0 | gi:587886862/gibberellin 20 oxidase 3 [ <i>Morus<br/>notabilis</i> ]         | CCCATTTCGACAATGCCACAAAG<br>GT | CCAGAACAACAAGTGGAAGTCC<br>GT  |
| comp12680_c<br>0 | gi:587893059/gibberellin 3-beta-dioxygenase<br>4 [ <i>Morus notabilis</i> ]  | CGCCAATTTTCGCCCTATGTCC        | CACCGTCAGCAGTCAACCCTC         |
| comp16885_c<br>0 | gi:587973425/gibberellin 2-beta-dioxygenase<br>1 [ <i>Morus notabilis</i> ]  | ACATTCCTCGGCTGAATCGTC         | GGGTCGAATACCTCCTCTTAACC<br>AC |
| comp17110_c<br>0 | gi:587942803/hypothetical protein<br>L484_021647 [ <i>Morus notabilis</i> ]  | GCAAATCCCGAACC GCGACT         | TTCCGACGATGATGCACGACT         |
| comp19377_c<br>0 | gi:587862256/hypothetical protein<br>L484_024617 [ <i>Morus notabilis</i> ]  | CCCTCCAGAGTCCCATACGGTT        | ATCTACAAGCCTCGCAGACACGA<br>T  |
| comp23225_c<br>0 | gi:587870483/putative protein phosphatase 2C<br>6 [ <i>Morus notabilis</i> ] | ACATCCCAAAGCCCATCACTTG<br>C   | AGGCCATGGATAATTCCCGTTCC<br>AG |
| comp25377_c<br>0 | gi:587848632/protein phosphatase 2C 16<br>[ <i>Morus notabilis</i> ]         | CCCTTTTGTTTCATGTAGGTGCTT      | CCTTCTCCATCAACTCGCGTTC        |

---

|                  |                                                                                         |                              |                               |
|------------------|-----------------------------------------------------------------------------------------|------------------------------|-------------------------------|
| comp18261_c<br>1 | gi:375155309/ABA responsive<br>element-binding protein [ <i>Solanum torvum</i> ]        | GCACCGTTTCTTCGCTCCC          | ACAAGGCTTATACAATGGAACTG<br>GA |
| comp11492_c<br>0 | gi:255556894/s-adenosylmethionine<br>synthetase, putative [ <i>Ricinus communis</i> ]   | ACACATCTCTTATTGCGGCCTC       | TGTTAAGATCCTCAAGCCGAAGG<br>T  |
| comp9988_c0      | gi:587870860/1-aminocyclopropane-1-carbox<br>ylate oxidase 5 [ <i>Morus notabilis</i> ] | ACATCTTCCCAGTCAGCGTTGT<br>CC | ACTTCAACAACCTCCAAAGCCGTC<br>A |

---

**Table S2** Summary of sequencing results for control and GA<sub>3</sub>-treated female flowers and receptacles

| <b>Sample</b>                                    | <b>Total clean reads</b> | <b>Total base pairs</b> | <b>Total mapped reads</b> | <b>Error (%)</b> | <b>Q20 (%)</b> | <b>Q30 (%)</b> | <b>GC (%)</b> |
|--------------------------------------------------|--------------------------|-------------------------|---------------------------|------------------|----------------|----------------|---------------|
| <b>Female flowers – control</b>                  |                          |                         |                           |                  |                |                |               |
| <b>2 DAT</b>                                     | 40,507,384               | 5,970,741,043           | 33,873,126 (83.62%)       | 0.0094           | 98.68          | 96.27          | 47.19         |
| <b>4 DAT</b>                                     | 33,382,198               | 4,921,053,317           | 27,890,594 (83.55%)       | 0.0096           | 98.58          | 96.06          | 47.28         |
| <b>10 DAT</b>                                    | 37,562,664               | 5,533,108,443           | 31,082,298 (82.75%)       | 0.0095           | 98.66          | 96.27          | 46.81         |
| <b>Female flowers – GA<sub>3</sub> treatment</b> |                          |                         |                           |                  |                |                |               |
| <b>2 DAT</b>                                     | 31,825,922               | 4,691,836,332           | 26,549,828 (83.42%)       | 0.0094           | 98.69          | 96.33          | 47.16         |
| <b>4 DAT</b>                                     | 29,725,356               | 4,369,210,432           | 24,775,132 (83.35%)       | 0.0097           | 98.52          | 95.91          | 47.09         |
| <b>10 DAT</b>                                    | 35,042,510               | 5,161,255,990           | 29,241,540 (83.45%)       | 0.0096           | 98.62          | 96.13          | 47.06         |
| <b>Receptacle – control</b>                      |                          |                         |                           |                  |                |                |               |
| <b>2 DAT</b>                                     | 32,072,882               | 4,725,438,484           | 26,724,548 (83.22%)       | 0.0094           | 98.68          | 96.3           | 47.74         |
| <b>4 DAT</b>                                     | 33,984,708               | 4,999,991,286           | 28,394,554 (83.55%)       | 0.0096           | 98.61          | 96.11          | 47.7          |
| <b>10 DAT</b>                                    | 39,066,466               | 5,751,772,897           | 32,078,648 (82.11%)       | 0.0095           | 98.63          | 96.15          | 47.38         |

---

| <b>Receptacle – GA<sub>3</sub> treatment</b> |            |               |                     |        |       |       |       |
|----------------------------------------------|------------|---------------|---------------------|--------|-------|-------|-------|
| <b>2 DAT</b>                                 | 36,232,880 | 5,330,791,349 | 30,257,864 (83.51%) | 0.0096 | 98.61 | 96.12 | 47.71 |
| <b>4 DAT</b>                                 | 32,486,194 | 4,778,371,956 | 27,252,842 (83.89%) | 0.0096 | 98.59 | 96.06 | 47.84 |
| <b>10 DAT</b>                                | 31,798,676 | 4,681,066,843 | 26,272,570 (82.62%) | 0.0096 | 98.62 | 96.16 | 47.32 |

---

DAT, days after treatment.

**Table S3** Significant GO terms (corrected *P*-value  $\leq 0.05$ ) identified between control and GA<sub>3</sub>-treated female flowers and receptacles

| No. | GO terms                                           | ID         | Number of genes |      |            |      |
|-----|----------------------------------------------------|------------|-----------------|------|------------|------|
|     |                                                    |            | Female flowers  |      | Receptacle |      |
|     | <b>Molecular function</b>                          |            | up              | down | up         | down |
|     | <b>2 DAT</b>                                       |            |                 |      |            |      |
| 1   | electron carrier activity                          | GO:0009055 | 3               | 2    | 4          | 0    |
| 2   | protein binding transcription factor activity      | GO:0000988 | 0               | 1    | 2          | 0    |
| 3   | binding                                            | GO:0005488 | 139             | 94   | 156        | 135  |
| 4   | transporter activity                               | GO:0005215 | 15              | 5    | 15         | 16   |
| 5   | catalytic activity                                 | GO:0003824 | 145             | 83   | 186        | 136  |
| 6   | enzyme regulator activity                          | GO:0030234 | 3               | 7    | 4          | 4    |
| 7   | molecular transducer activity                      | GO:0060089 | 4               | 1    | 5          | 3    |
| 8   | receptor activity                                  | GO:0004872 | 2               | 0    | 4          | 0    |
| 9   | nucleic acid binding transcription factor activity | GO:0001071 | 23              | 3    | 15         | 12   |
| 10  | antioxidant activity                               | GO:0016209 | 1               | 2    | 2          | 4    |
| 11  | structural molecule activity                       | GO:0005198 | 0               | 0    | 1          | 4    |
|     | <b>Cellular component</b>                          |            |                 |      |            |      |
| 1   | symplast                                           | GO:0055044 | 3               | 4    | 3          | 8    |
| 2   | organelle                                          | GO:0043226 | 33              | 45   | 40         | 65   |
| 3   | cell part                                          | GO:0044464 | 56              | 62   | 68         | 91   |
| 4   | membrane part                                      | GO:0044425 | 35              | 23   | 37         | 36   |
| 5   | extracellular region                               | GO:0005576 | 3               | 4    | 9          | 8    |
| 6   | cell junction                                      | GO:0030054 | 3               | 4    | 3          | 8    |
| 7   | membrane                                           | GO:0016020 | 47              | 36   | 55         | 62   |
| 8   | macromolecular complex                             | GO:0032991 | 30              | 27   | 34         | 36   |
| 9   | cell                                               | GO:0005623 | 56              | 62   | 68         | 91   |
| 10  | organelle part                                     | GO:0044422 | 8               | 29   | 14         | 29   |
|     | <b>Biological process</b>                          |            |                 |      |            |      |
| 1   | multiorganism process                              | GO:0051704 | 4               | 4    | 8          | 7    |
| 2   | developmental process                              | GO:0032502 | 7               | 4    | 7          | 6    |
| 3   | positive regulation of biological process          | GO:0048518 | 4               | 1    | 1          | 1    |
| 4   | multicellular organismal process                   | GO:0032501 | 7               | 4    | 10         | 5    |
| 5   | cellular process                                   | GO:0009987 | 141             | 83   | 158        | 135  |

|    |                                                    |            |                       |             |                   |             |
|----|----------------------------------------------------|------------|-----------------------|-------------|-------------------|-------------|
| 6  | single-organism process                            | GO:0044699 | 130                   | 59          | 151               | 112         |
| 7  | growth                                             | GO:0040007 | 1                     | 2           | 1                 | 2           |
| 8  | signaling                                          | GO:0023052 | 11                    | 3           | 11                | 7           |
| 9  | negative regulation of biological process          | GO:0048519 | 2                     | 2           | 2                 | 1           |
| 10 | metabolic process                                  | GO:0008152 | 182                   | 117         | 215               | 192         |
| 11 | biological regulation                              | GO:0065007 | 52                    | 23          | 52                | 37          |
| 12 | reproductive process                               | GO:0022414 | 2                     | 2           | 4                 | 3           |
| 13 | regulation of biological process                   | GO:0050789 | 51                    | 23          | 50                | 35          |
| 14 | cellular component organization or biogenesis      | GO:0071840 | 4                     | 10          | 17                | 13          |
| 15 | establishment of localization                      | GO:0051234 | 28                    | 11          | 27                | 31          |
| 16 | rhythmic process                                   | GO:0048511 | 1                     | 0           | 1                 | 0           |
| 17 | response to stimulus                               | GO:0050896 | 33                    | 44          | 28                | 55          |
| 18 | localization                                       | GO:0051179 | 28                    | 11          | 28                | 32          |
| 19 | biological adhesion                                | GO:0022610 | 0                     | 0           | 0                 | 1           |
|    | <b>4 DAT</b>                                       |            | <b>Female flowers</b> |             | <b>Receptacle</b> |             |
|    | <b>Molecular function</b>                          |            | <b>up</b>             | <b>down</b> | <b>up</b>         | <b>down</b> |
| 1  | electron carrier activity                          | GO:0009055 | 2                     | 0           | 2                 | 1           |
| 2  | protein binding transcription factor activity      | GO:0000988 | 0                     | 0           | 2                 | 1           |
| 3  | binding                                            | GO:0005488 | 37                    | 73          | 159               | 121         |
| 4  | transporter activity                               | GO:0005215 | 2                     | 4           | 20                | 10          |
| 5  | catalytic activity                                 | GO:0003824 | 34                    | 54          | 192               | 114         |
| 6  | enzyme regulator activity                          | GO:0030234 | 1                     | 1           | 3                 | 3           |
| 7  | molecular transducer activity                      | GO:0060089 | 0                     | 2           | 3                 | 2           |
| 8  | structural molecule activity                       | GO:0005198 | 1                     | 3           | 12                | 0           |
| 9  | receptor activity                                  | GO:0004872 | 0                     | 0           | 2                 | 0           |
| 10 | nucleic acid binding transcription factor activity | GO:0001071 | 2                     | 7           | 10                | 16          |
| 11 | antioxidant activity                               | GO:0016209 | 0                     | 2           | 1                 | 0           |
|    | <b>Cellular component</b>                          |            |                       |             |                   |             |
| 1  | symplast                                           | GO:0055044 | 0                     | 3           | 11                | 2           |
| 2  | organelle                                          | GO:0043226 | 8                     | 24          | 69                | 38          |
| 3  | cell part                                          | GO:0044464 | 16                    | 31          | 119               | 58          |
| 4  | membrane part                                      | GO:0044425 | 4                     | 7           | 49                | 22          |
| 5  | extracellular region                               | GO:0005576 | 8                     | 1           | 15                | 2           |
| 6  | cell junction                                      | GO:0030054 | 0                     | 3           | 11                | 2           |

|    |                                               |            |                       |             |                   |             |
|----|-----------------------------------------------|------------|-----------------------|-------------|-------------------|-------------|
| 7  | membrane                                      | GO:0016020 | 10                    | 11          | 76                | 32          |
| 8  | macromolecular complex                        | GO:0032991 | 3                     | 17          | 56                | 28          |
| 9  | cell                                          | GO:0005623 | 16                    | 31          | 119               | 58          |
| 10 | organelle part                                | GO:0044422 | 4                     | 9           | 35                | 17          |
|    | <b>Biological process</b>                     |            |                       |             |                   |             |
| 1  | multiorganism process                         | GO:0051704 | 0                     | 7           | 5                 | 6           |
| 2  | developmental process                         | GO:0032502 | 2                     | 4           | 6                 | 4           |
| 3  | positive regulation of biological process     | GO:0048518 | 1                     | 2           | 3                 | 2           |
| 4  | multicellular organismal process              | GO:0032501 | 2                     | 6           | 10                | 4           |
| 5  | cellular process                              | GO:0009987 | 30                    | 64          | 190               | 100         |
| 6  | single-organism process                       | GO:0044699 | 33                    | 45          | 150               | 89          |
| 7  | growth                                        | GO:0040007 | 0                     | 1           | 2                 | 0           |
| 8  | signaling                                     | GO:0023052 | 0                     | 4           | 15                | 0           |
| 9  | negative regulation of biological process     | GO:0048519 | 1                     | 3           | 3                 | 1           |
| 10 | metabolic process                             | GO:0008152 | 39                    | 84          | 227               | 150         |
| 11 | biological regulation                         | GO:0065007 | 8                     | 17          | 52                | 31          |
| 12 | reproductive process                          | GO:0022414 | 1                     | 6           | 4                 | 5           |
| 13 | regulation of biological process              | GO:0050789 | 8                     | 17          | 49                | 30          |
| 14 | cellular component organization or biogenesis | GO:0071840 | 6                     | 4           | 28                | 1           |
| 15 | establishment of localization                 | GO:0051234 | 4                     | 6           | 37                | 15          |
| 16 | rhythmic process                              | GO:0048511 | 0                     | 1           | 0                 | 0           |
| 17 | response to stimulus                          | GO:0050896 | 4                     | 35          | 37                | 48          |
| 18 | localization                                  | GO:0051179 | 4                     | 6           | 39                | 15          |
| 19 | reproduction                                  | GO:0000003 | 0                     | 0           | 1                 | 1           |
|    | <b>10 DAT</b>                                 |            | <b>Female flowers</b> |             | <b>Receptacle</b> |             |
|    | <b>Molecular function</b>                     |            | <b>up</b>             | <b>down</b> | <b>up</b>         | <b>down</b> |
| 1  | electron carrier activity                     | GO:0009055 | 4                     | 1           | 6                 | 3           |
| 2  | protein binding transcription factor activity | GO:0000988 | 1                     | 0           | 1                 | 1           |
| 3  | binding                                       | GO:0005488 | 191                   | 278         | 198               | 250         |
| 4  | transporter activity                          | GO:0005215 | 15                    | 56          | 17                | 52          |
| 5  | catalytic activity                            | GO:0003824 | 253                   | 399         | 279               | 320         |
| 6  | guanyl-nucleotide exchange factor activity    | GO:0005085 | 1                     | 0           | 1                 | 0           |
| 7  | enzyme regulator activity                     | GO:0030234 | 2                     | 12          | 12                | 8           |
| 8  | molecular transducer activity                 | GO:0060089 | 2                     | 6           | 2                 | 5           |



|    |                                                    |            |     |     |     |     |
|----|----------------------------------------------------|------------|-----|-----|-----|-----|
| 9  | structural molecule activity                       | GO:0005198 | 14  | 0   | 9   | 2   |
| 10 | receptor activity                                  | GO:0004872 | 1   | 1   | 1   | 1   |
| 11 | nucleic acid binding transcription factor activity | GO:0001071 | 15  | 20  | 1   | 1   |
| 12 | antioxidant activity                               | GO:0016209 | 7   | 7   | 9   | 2   |
|    | <b>Cellular component</b>                          |            |     |     |     |     |
| 1  | symplast                                           | GO:0055044 | 7   | 4   | 11  | 6   |
| 2  | extracellular matrix                               | GO:0031012 | 1   | 0   | 0   | 0   |
| 3  | extracellular region part                          | GO:0044421 | 3   | 1   | 0   | 0   |
| 4  | extracellular region                               | GO:0005576 | 0   | 0   | 24  | 11  |
| 5  | organelle                                          | GO:0043226 | 74  | 68  | 64  | 69  |
| 6  | cell part                                          | GO:0044464 | 108 | 109 | 106 | 109 |
| 7  | membrane part                                      | GO:0044425 | 33  | 88  | 48  | 74  |
| 8  | extracellular region                               | GO:0005576 | 24  | 12  | 24  | 11  |
| 9  | cell junction                                      | GO:0030054 | 7   | 4   | 11  | 6   |
| 10 | nucleoid                                           | GO:0009295 | 0   | 1   | 0   | 0   |
| 11 | membrane                                           | GO:0016020 | 65  | 132 | 89  | 115 |
| 12 | macromolecular complex                             | GO:0032991 | 49  | 48  | 38  | 49  |
| 13 | cell                                               | GO:0005623 | 108 | 109 | 106 | 109 |
| 14 | organelle part                                     | GO:0044422 | 39  | 32  | 27  | 32  |
|    | <b>Biological process</b>                          |            |     |     |     |     |
| 1  | reproduction                                       | GO:0000003 | 1   | 0   | 2   | 2   |
| 2  | multiorganism process                              | GO:0051704 | 4   | 8   | 9   | 8   |
| 3  | developmental process                              | GO:0032502 | 12  | 13  | 11  | 7   |
| 4  | positive regulation of biological process          | GO:0048518 | 4   | 4   | 1   | 5   |
| 5  | multicellular organismal process                   | GO:0032501 | 12  | 10  | 12  | 8   |
| 6  | cellular process                                   | GO:0009987 | 188 | 290 | 203 | 263 |
| 7  | single-organism process                            | GO:0044699 | 195 | 314 | 206 | 261 |
| 8  | growth                                             | GO:0040007 | 1   | 1   | 3   | 0   |
| 9  | signaling                                          | GO:0023052 | 9   | 15  | 9   | 16  |
| 10 | negative regulation of biological process          | GO:0048519 | 5   | 3   | 2   | 1   |
| 11 | metabolic process                                  | GO:0008152 | 280 | 432 | 300 | 363 |
| 12 | biological regulation                              | GO:0065007 | 40  | 79  | 50  | 75  |
| 13 | reproductive process                               | GO:0022414 | 3   | 2   | 5   | 5   |
| 14 | regulation of biological process                   | GO:0050789 | 36  | 72  | 47  | 71  |
| 15 | establishment of localization                      | GO:0051234 | 27  | 77  | 29  | 69  |

|    |                                               |            |    |    |    |    |
|----|-----------------------------------------------|------------|----|----|----|----|
| 16 | rhythmic process                              | GO:0048511 | 0  | 2  | 0  | 0  |
| 17 | cellular component organization or biogenesis | GO:0071840 | 36 | 6  | 32 | 8  |
| 18 | response to stimulus                          | GO:0050896 | 51 | 68 | 51 | 65 |
| 19 | biological adhesion                           | GO:0022610 | 1  | 1  | 1  | 0  |
| 20 | localization                                  | GO:0051179 | 29 | 78 | 30 | 69 |

The representative terms with a large number of differentially expressed genes are highlighted in yellow. DAT, days after treatment.

**Table S4** Significant KEGG pathways (corrected  $P$ -value  $\leq 0.05$ ) identified between GA<sub>3</sub>-treated and control female flowers and receptacle

| No.                            | Pathway                                     | Number of genes | corrected $P$ -value | Pathway ID |
|--------------------------------|---------------------------------------------|-----------------|----------------------|------------|
| <b>Female flowers (2 DAT)</b>  |                                             |                 |                      |            |
| 1                              | Protein processing in endoplasmic reticulum | 34              | 2.87E-13             | ko04141    |
| 2                              | Photosynthesis – antenna proteins           | 6               | 6.89E-04             | ko00196    |
| 3                              | Photosynthesis                              | 9               | 0.00217              | ko00195    |
| 4                              | Plant–pathogen interaction                  | 13              | 0.0224               | ko04626    |
| <b>Female flowers (4 DAT)</b>  |                                             |                 |                      |            |
| 1                              | Protein processing in endoplasmic reticulum | 25              | 1.02E-10             | ko04141    |
| <b>Female flowers (10 DAT)</b> |                                             |                 |                      |            |
| 1                              | Alanine, aspartate and glutamate metabolism | 13              | 1.57E-06             | ko00250    |
| 2                              | Phenylpropanoid biosynthesis                | 23              | 4.46E-04             | ko00940    |
| 3                              | Phenylalanine metabolism                    | 18              | 8.14E-04             | ko00360    |
| 4                              | Flavonoid biosynthesis                      | 10              | 0.00556              | ko00941    |
| 5                              | Cysteine and methionine metabolism          | 15              | 0.00724              | ko00270    |
| 6                              | Carbon fixation in photosynthetic organisms | 14              | 0.0117               | ko00710    |
| 7                              | Tryptophan metabolism                       | 8               | 0.0143               | ko00380    |
| 8                              | Arginine and proline metabolism             | 13              | 0.0143               | ko00330    |
| 9                              | Galactose metabolism                        | 11              | 0.0165               | ko00052    |
| 10                             | Nitrogen metabolism                         | 8               | 0.0170               | ko00910    |
| 11                             | Fatty acid metabolism                       | 9               | 0.0176               | ko00071    |
| 12                             | Other glycan degradation                    | 5               | 0.0191               | ko00511    |
| 13                             | Tyrosine metabolism                         | 8               | 0.0460               | ko00350    |
| <b>Receptacle (2 DAT)</b>      |                                             |                 |                      |            |
| 1                              | Protein processing in endoplasmic reticulum | 31              | 8.76E-08             | ko04141    |
| 2                              | Photosynthesis – antenna proteins           | 7               | 3.90E-04             | ko00196    |
| 3                              | Nitrogen metabolism                         | 8               | 0.00257              | ko00910    |
| 4                              | Phenylalanine metabolism                    | 12              | 0.00888              | ko00360    |
| 5                              | Plant hormone signal transduction           | 20              | 0.0150               | ko04075    |
| 6                              | Cysteine and methionine metabolism          | 11              | 0.0150               | ko00270    |
| 7                              | Glycine, serine and threonine metabolism    | 9               | 0.0154               | ko00260    |
| 8                              | Carotenoid biosynthesis                     | 6               | 0.0154               | ko00906    |

|                            |                                             |    |          |         |
|----------------------------|---------------------------------------------|----|----------|---------|
| 9                          | Photosynthesis                              | 8  | 0.0325   | ko00195 |
| <b>Receptacle (4 DAT)</b>  |                                             |    |          |         |
| 1                          | Protein processing in endoplasmic reticulum | 30 | 1.10E-06 | ko04141 |
| 2                          | Circadian rhythm – plant                    | 8  | 0.00231  | ko04712 |
| 3                          | Cysteine and methionine metabolism          | 13 | 0.00281  | ko00270 |
| 4                          | Endocytosis                                 | 13 | 0.0326   | ko04144 |
| <b>Receptacle (10 DAT)</b> |                                             |    |          |         |
| 1                          | Cysteine and methionine metabolism          | 21 | 2.95E-07 | ko00270 |
| 2                          | Carbon fixation in photosynthetic organisms | 15 | 9.82E-04 | ko00710 |
| 3                          | Galactose metabolism                        | 12 | 0.00229  | ko00052 |
| 4                          | Phenylalanine metabolism                    | 14 | 0.00863  | ko00360 |
| 5                          | Pentose and glucuronate interconversions    | 12 | 0.0120   | ko00040 |
| 6                          | Starch and sucrose metabolism               | 21 | 0.0120   | ko00500 |
| 7                          | Plant hormone signal transduction           | 24 | 0.0120   | ko04075 |
| 8                          | Tyrosine metabolism                         | 8  | 0.0260   | ko00350 |
| 9                          | Terpenoid backbone biosynthesis             | 8  | 0.0260   | ko00900 |
| 10                         | Arginine and proline metabolism             | 11 | 0.0325   | ko00330 |
| 11                         | Pentose phosphate pathway                   | 8  | 0.0427   | ko00030 |
| 12                         | Carotenoid biosynthesis                     | 6  | 0.0460   | ko00906 |

DAT, days after treatment.

**Table S5** All gibberellin-, auxin- and cytokinin-synthesis, catabolism and response transcripts identified in this study which were differentially expressed (FDR < 0.01 and the absolute value of  $\log_2(\text{FPKM}_{\text{treatment}}/\text{FPKM}_{\text{control}}) \geq 1$ ) in at least one pairwise comparison group

| Gene name                                                 | Gene ID / Protein ID          | Description in NR database                                  | Similarity (%) |
|-----------------------------------------------------------|-------------------------------|-------------------------------------------------------------|----------------|
| <b>Gibberellin metabolism- and response-related genes</b> |                               |                                                             |                |
| <b>GA20ox</b>                                             |                               |                                                             |                |
| comp57463_c0                                              | gi:587886862 / EXB75633.1     | Gibberellin 20 oxidase 3 [ <i>Morus notabilis</i> ]         | 91%            |
| <b>GA3ox</b>                                              |                               |                                                             |                |
| comp12680_c0                                              | gi:587893059 / EXB81619.1     | Gibberellin 3-beta-dioxygenase 4 [ <i>Morus notabilis</i> ] | 88%            |
| comp13433_c0                                              | gi:587946228 / EXC32577.1     | Gibberellin 3-beta-dioxygenase 1 [ <i>Morus notabilis</i> ] | 89%            |
| comp22862_c0                                              | gi:587893059 / EXB81619.1     | Gibberellin 3-beta-dioxygenase 4 [ <i>Morus notabilis</i> ] | 89%            |
| <b>GA2ox</b>                                              |                               |                                                             |                |
| comp16885_c0                                              | gi:587973425 / EXC58248.1     | Gibberellin 2-beta-dioxygenase 1 [ <i>Morus notabilis</i> ] | 91%            |
| comp26664_c0                                              | gi:587946750 / EXC33074.1     | Gibberellin 2-beta-dioxygenase 8 [ <i>Morus notabilis</i> ] | 93%            |
| comp32778_c0                                              | gi:587942817 / EXC29353.1     | Gibberellin 2-beta-dioxygenase [ <i>Morus notabilis</i> ]   | 93%            |
| comp18866_c0                                              | gi:587906001 / EXB94107.1     | Gibberellin 2-beta-dioxygenase 8 [ <i>Morus notabilis</i> ] | 80%            |
| comp53019_c0                                              | gi:587866532 / EXB55989.1     | Gibberellin 2-beta-dioxygenase 2 [ <i>Morus notabilis</i> ] | 85%            |
| comp23223_c0                                              | gi:587917544 / EXC05108.1     | Gibberellin 2-beta-dioxygenase 8 [ <i>Morus notabilis</i> ] | 93%            |
| <b>DELLA</b>                                              |                               |                                                             |                |
| comp26619_c0                                              | gi:645278651 / XP_008244327.1 | PREDICTED: scarecrow-like protein 21 [ <i>Prunus mume</i> ] | 80%            |

| <b>Auxin metabolism- and response-related genes</b> |                               |                                                                     |     |
|-----------------------------------------------------|-------------------------------|---------------------------------------------------------------------|-----|
| <b>Aldehyde (IAld) dehydrogenase</b>                |                               |                                                                     |     |
| comp9282_c0                                         | gi:595802986 / XP_007201943.1 | Hypothetical protein PRUPE_ppa004461mg [ <i>Prunus persica</i> ]    | 95% |
| comp11862_c0                                        | gi:587899465 / EXB87864.1     | Aldehyde dehydrogenase family 2 member [ <i>Morus notabilis</i> ]   | 82% |
| <b>IAA-amino acid hydrolase</b>                     |                               |                                                                     |     |
| comp20467_c0                                        | gi:587844298 / EXB34859.1     | IAA-amino acid hydrolase ILR1-like 4 [ <i>Morus notabilis</i> ]     | 96% |
| comp25015_c0                                        | gi:587844301 / EXB34862.1     | IAA-amino acid hydrolase ILR1-like 5 [ <i>Morus notabilis</i> ]     | 78% |
| comp12153_c0                                        | gi:587894121 / EXB82653.1     | IAA-amino acid hydrolase ILR1-like 2 [ <i>Morus notabilis</i> ]     | 95% |
| <b>GH3</b>                                          |                               |                                                                     |     |
| comp25108_c0                                        | gi:587861039 / EXB50903.1     | Hypothetical protein L484_021129 [ <i>Morus notabilis</i> ]         | 96% |
| comp29694_c0                                        | gi:587887925 / EXB76648.1     | Hypothetical protein L484_011493 [ <i>Morus notabilis</i> ]         | 96% |
| <b>AUX1</b>                                         |                               |                                                                     |     |
| comp30772_c0                                        | gi:659131659 / XP_008465793.1 | PREDICTED: auxin transporter-like protein 3 [ <i>Cucumis melo</i> ] | 96% |
| <b>AUX/IAA</b>                                      |                               |                                                                     |     |
| comp12280_c0                                        | gi:587835799 / EXB26568.1     | Auxin-induced protein IAA4 [ <i>Morus notabilis</i> ]               | 62% |
| comp16786_c0                                        | gi:587939152 / EXC25824.1     | Auxin-induced protein AUX22 [ <i>Morus notabilis</i> ]              | 82% |
| comp21990_c0                                        | gi:587939153 / EXC25825.1     | Auxin-responsive protein IAA17 [ <i>Morus notabilis</i> ]           | 87% |
| comp20539_c0                                        | gi:388509620 / AFK42876.1     | Unknown [ <i>Medicago truncatula</i> ]                              | 77% |
| comp13087_c0                                        | gi:587905040 / EXB93236.1     | Auxin-responsive protein IAA3 [ <i>Morus notabilis</i> ]            | 84% |
| comp12423_c0                                        | gi:587916406 / EXC04075.1     | Auxin-responsive protein IAA13 [ <i>Morus notabilis</i> ]           | 86% |

|                                                         |                               |                                                                                              |     |
|---------------------------------------------------------|-------------------------------|----------------------------------------------------------------------------------------------|-----|
| comp7006_c0                                             | gi:470109762 / XP_004291159.1 | PREDICTED: auxin-responsive protein IAA26-like [ <i>Fragaria vesca</i> subsp. <i>vesca</i> ] | 68% |
| <b>ARF</b>                                              |                               |                                                                                              |     |
| comp32528_c0                                            | gi:587869068 / EXB58397.1     | Auxin response factor 5 [ <i>Morus notabilis</i> ]                                           | 95% |
| <b>SAUR</b>                                             |                               |                                                                                              |     |
| comp33019_c0                                            | gi:587853002 / EXB43114.1     | Hypothetical protein L484_002582 [ <i>Morus notabilis</i> ]                                  | 86% |
| comp36657_c0                                            | gi:587929004 / EXC16179.1     | Hypothetical protein L484_024347 [ <i>Morus notabilis</i> ]                                  | 95% |
| comp16559_c0                                            | gi:587872564 / EXB61802.1     | Hypothetical protein L484_012234 [ <i>Morus notabilis</i> ]                                  | 83% |
| comp31670_c0                                            | gi:587846607 / EXB37077.1     | Hypothetical protein L484_020868 [ <i>Morus notabilis</i> ]                                  | 92% |
| comp19373_c0                                            | gi:587850151 / EXB40340.1     | Hypothetical protein L484_017482 [ <i>Morus notabilis</i> ]                                  | 88% |
| <b>Cytokinin metabolism- and response-related genes</b> |                               |                                                                                              |     |
| <b>IPT</b>                                              |                               |                                                                                              |     |
| comp9983_c0                                             | gi:587907848 / EXB95832.1     | Adenylate isopentenyltransferase 5 [ <i>Morus notabilis</i> ]                                | 85% |
| <b>CKX</b>                                              |                               |                                                                                              |     |
| comp21589_c0                                            | gi:587938282 / EXC25031.1     | Cytokinin dehydrogenase 5 [ <i>Morus notabilis</i> ]                                         | 91% |
| comp11524_c0                                            | gi:587923105 / EXC10466.1     | Cytokinin dehydrogenase 1 [ <i>Morus notabilis</i> ]                                         | 95% |
| <b>CIS-ZOG</b>                                          |                               |                                                                                              |     |
| comp18972_c0                                            | gi:587860262 / EXB50176.1     | Zeatin O-glucosyltransferase [ <i>Morus notabilis</i> ]                                      | 88% |
| comp21293_c0                                            | gi:587860262 / EXB50176.1     | Zeatin O-glucosyltransferase [ <i>Morus notabilis</i> ]                                      | 80% |

|              |                           |                                                                         |     |
|--------------|---------------------------|-------------------------------------------------------------------------|-----|
| comp20461_c0 | gi:604298708 / EYU18710.1 | Hypothetical protein MIMGU_mgv1a005799mg [ <i>Erythranthe guttata</i> ] | 86% |
| <b>CRE1</b>  |                           |                                                                         |     |
| comp16591_c0 | gi:587850113 / EXB40302.1 | Histidine kinase 3 [ <i>Morus notabilis</i> ]                           | 95% |
| <b>A-ARR</b> |                           |                                                                         |     |
| comp4260_c0  | gi:587908595 / EXB96540.1 | Two-component response regulator [ <i>Morus notabilis</i> ]             | 98% |
| comp16589_c0 | gi:587945862 / EXC32234.1 | Two-component response regulator [ <i>Morus notabilis</i> ]             | 88% |



**Table S6** All abscisic acid- and ethylene-synthesis, catabolism and response transcripts identified in this study which were differentially expressed (FDR < 0.01 and the absolute value of  $\log_2(\text{FPKM}_{\text{treatment}}/\text{FPKM}_{\text{control}}) \geq 1$ ) in at least one pairwise comparison group

| Gene name                                         | Gene ID / Protein ID      | Description in NR database                                   | Similarity (%) |
|---------------------------------------------------|---------------------------|--------------------------------------------------------------|----------------|
| <b>ABA metabolism- and response-related genes</b> |                           |                                                              |                |
| <b>NCED</b>                                       |                           |                                                              |                |
| comp22655_c0                                      | gi:587942803 / EXC29339.1 | Hypothetical protein L484_021647 [ <i>Morus notabilis</i> ]  | 82%            |
| comp17110_c0                                      | gi:587942803 / EXC29339.1 | Hypothetical protein L484_021647 [ <i>Morus notabilis</i> ]  | 96%            |
| comp26438_c0                                      | gi:587930726 / EXC17835.1 | Hypothetical protein L484_023189 [ <i>Morus notabilis</i> ]  | 89%            |
| comp19377_c0                                      | gi:587862256 / EXB52067.1 | Hypothetical protein L484_024617 [ <i>Morus notabilis</i> ]  | 93%            |
| <b>ABA2</b>                                       |                           |                                                              |                |
| comp12226_c0                                      | gi:587923076 / EXC10437.1 | Xanthoxin dehydrogenase [ <i>Morus notabilis</i> ]           | 93%            |
| <b>ABA 8'-hydroxylase</b>                         |                           |                                                              |                |
| comp9528_c0                                       | gi:587945275 / EXC31689.1 | Abscisic acid 8'-hydroxylase 1 [ <i>Morus notabilis</i> ]    | 94%            |
| <b>PYR/PYL</b>                                    |                           |                                                              |                |
| comp25256_c0                                      | gi:587862606 / EXB52402.1 | Hypothetical protein L484_012047 [ <i>Morus notabilis</i> ]  | 92%            |
| <b>PP2C</b>                                       |                           |                                                              |                |
| comp23225_c0                                      | gi:587870483 / EXB59766.1 | Putative protein phosphatase 2C 6 [ <i>Morus notabilis</i> ] | 98%            |
| comp25377_c0                                      | gi:587848632 / EXB38891.1 | Protein phosphatase 2C 16 [ <i>Morus notabilis</i> ]         | 90%            |
| comp14332_c0                                      | gi:587877015 / EXB66087.1 | Putative protein phosphatase 2C 8 [ <i>Morus notabilis</i> ] | 87%            |

|                                                        |                               |                                                                                               |      |
|--------------------------------------------------------|-------------------------------|-----------------------------------------------------------------------------------------------|------|
| comp16460_c0                                           | gi:587923379 / EXC10729.1     | Putative protein phosphatase 2C 24 [ <i>Morus notabilis</i> ]                                 | 85%  |
| comp25508_c0                                           | gi:645258105 / XP_008234728.1 | PREDICTED: probable protein phosphatase 2C 51 [ <i>Prunus mume</i> ]                          | 78%  |
| comp19341_c0                                           | gi:587933921 / EXC20871.1     | Putative protein phosphatase 2C 75 [ <i>Morus notabilis</i> ]                                 | 78%  |
| <b>ABF</b>                                             |                               |                                                                                               |      |
| comp30505_c0                                           | gi:587946520 / EXC32855.1     | ABSCISIC ACID-INSENSITIVE 5-like protein 5 [ <i>Morus notabilis</i> ]                         | 91%  |
| comp18261_c1                                           | gi:375155309 / AFA37978.1     | ABA responsive element-binding protein [ <i>Solanum torvum</i> ]                              | 98%  |
| comp16514_c0                                           | gi:587946520 / EXC32855.1     | ABSCISIC ACID-INSENSITIVE 5-like protein 5 [ <i>Morus notabilis</i> ]                         | 87%  |
| comp89455_c0                                           | gi:587848159 / EXB38447.1     | ABSCISIC ACID-INSENSITIVE 5-like protein 1 [ <i>Morus notabilis</i> ]                         | 86%  |
| <b>Ethylene metabolism- and response-related genes</b> |                               |                                                                                               |      |
| <b>SAM synthetase</b>                                  |                               |                                                                                               |      |
| comp11492_c0                                           | gi:255556894 / XP_002519480.1 | S-adenosylmethionine synthetase, putative [ <i>Ricinus communis</i> ]                         | 100% |
| comp28987_c0                                           | gi:460408090 / XP_004249481.1 | PREDICTED: S-adenosylmethionine synthase 2-like [ <i>Solanum lycopersicum</i> ]               | 100% |
| comp28816_c0                                           | gi:449451048 / XP_004143274.1 | PREDICTED: S-adenosylmethionine synthase 2-like [ <i>Cucumis sativus</i> ]                    | 100% |
| comp30786_c0                                           | gi:255543014 / XP_002512570.1 | S-adenosylmethionine synthetase, putative [ <i>Ricinus communis</i> ]                         | 100% |
| comp7483_c0                                            | gi:470132951 / XP_004302338.1 | PREDICTED: S-adenosylmethionine synthase 1-like [ <i>Fragaria vesca</i> subsp. <i>Vesca</i> ] | 98%  |
| <b>ACC synthase</b>                                    |                               |                                                                                               |      |
| comp27593_c0                                           | gi:587846852 / EXB37292.1     | 1-Aminocyclopropane-1-carboxylate synthase [ <i>Morus notabilis</i> ]                         | 94%  |
| comp21829_c0                                           | gi:587861793 / EXB51626.1     | 1-Aminocyclopropane-1-carboxylate synthase 1 [ <i>Morus notabilis</i> ]                       | 95%  |
| <b>ACC oxidase</b>                                     |                               |                                                                                               |      |

|               |                               |                                                                                            |      |
|---------------|-------------------------------|--------------------------------------------------------------------------------------------|------|
| comp23635_c1  | gi:166788505 / BAG06705.1     | 1-Aminocyclopropane-1-carboxylate oxidase [ <i>Ficus carica</i> ]                          | 100% |
| comp27433_c0  | gi:587864354 / EXB54016.1     | 1-Aminocyclopropane-1-carboxylate oxidase-3-like protein [ <i>Morus notabilis</i> ]        | 90%  |
| comp30808_c0  | gi:587929255 / EXC16422.1     | 1-Aminocyclopropane-1-carboxylate oxidase-1-like protein [ <i>Morus notabilis</i> ]        | 86%  |
| comp9988_c0   | gi:587870860 / EXB60136.1     | 1-Aminocyclopropane-1-carboxylate oxidase 5 [ <i>Morus notabilis</i> ]                     | 94%  |
| comp11309_c0  | gi:587940644 / EXC27244.1     | 1-Aminocyclopropane-1-carboxylate oxidase 3 [ <i>Morus notabilis</i> ]                     | 97%  |
| comp585_c0    | gi:645235671 / XP_008224379.1 | PREDICTED: 1-Aminocyclopropane-1-carboxylate oxidase homolog 1-like [ <i>Prunus mume</i> ] | 91%  |
| <b>ETR</b>    |                               |                                                                                            |      |
| comp16652_c0  | gi:587910281 / EXB98165.1     | Ethylene receptor 2 [ <i>Morus notabilis</i> ]                                             | 92%  |
| comp29504_c0  | gi:587907745 / EXB95735.1     | Ethylene response sensor 1 [ <i>Morus notabilis</i> ]                                      | 96%  |
| comp30741_c0  | gi:587905004 / EXB93200.1     | Protein EIN4 [ <i>Morus notabilis</i> ]                                                    | 94%  |
| <b>EBF1/2</b> |                               |                                                                                            |      |
| comp9018_c0   | gi:587830385 / EXB21298.1     | Hypothetical protein L484_002248 [ <i>Morus notabilis</i> ]                                | 95%  |
| <b>ERF</b>    |                               |                                                                                            |      |
| comp16781_c0  | gi:587914274 / EXC02053.1     | Ethylene-responsive transcription factor 2 [ <i>Morus notabilis</i> ]                      | 82%  |
| comp16998_c0  | gi:587864373 / EXB54035.1     | Ethylene-responsive transcription factor 1B [ <i>Morus notabilis</i> ]                     | 94%  |
| comp17108_c0  | gi:587854580 / EXB44623.1     | Ethylene-responsive transcription factor 4 [ <i>Morus notabilis</i> ]                      | 82%  |
| comp28870_c0  | gi:225455041 / XP_002282167.1 | PREDICTED: Ethylene-responsive transcription factor 5 [ <i>Vitis vinifera</i> ]            | 60%  |

|              |                           |                                                                        |     |
|--------------|---------------------------|------------------------------------------------------------------------|-----|
| comp10854_c0 | gi:587944083 / EXC30582.1 | Ethylene-responsive transcription factor 12 [ <i>Morus notabilis</i> ] | 84% |
| comp22612_c0 | gi:587864369 / EXB54031.1 | Ethylene-responsive transcription factor [ <i>Morus notabilis</i> ]    | 83% |
| comp25440_c0 | gi:587847245 / EXB37641.1 | Ethylene-responsive transcription factor 13 [ <i>Morus notabilis</i> ] | 79% |
| comp46255_c0 | gi:587945546 / EXC31946.1 | Ethylene-responsive transcription factor 15 [ <i>Morus notabilis</i> ] | 76% |
| comp7982_c0  | gi:587892625 / EXB81200.1 | Ethylene-responsive transcription factor [ <i>Morus notabilis</i> ]    | 90% |
| comp24422_c0 | gi:587925050 / EXC12328.1 | Ethylene-responsive transcription factor [ <i>Morus notabilis</i> ]    | 64% |
| comp18924_c0 | gi:587925050 / EXC12328.1 | Ethylene-responsive transcription factor [ <i>Morus notabilis</i> ]    | 74% |
| comp33022_c0 | gi:587925344 / EXC12612.1 | AP2-like ethylene-responsive transcription factor ANT [ <i>Morus</i>   | 90% |
| comp7744_c0  | gi:587934118 / EXC21056.1 | Ethylene-responsive transcription factor 2 [ <i>Morus notabilis</i> ]  | 81% |
| comp34364_c0 | gi:587935540 / EXC22410.1 | AP2-like ethylene-responsive transcription factor ANT [ <i>Morus</i>   | 85% |
| comp39079_c0 | gi:587892747 / EXB81318.1 | Ethylene-responsive transcription factor 3 [ <i>Morus notabilis</i> ]  | 86% |

## Supplementary Figure legends

**Figure S1** Verification of RNA-Seq results by qRT-PCR. Bars represent standard deviation. F, female flowers; R, receptacle

**Figure S2** Correlation of fold changes in gene expression between RNA-Seq and qRT-PCR. Equation of linear regression and correlation coefficient ( $R^2$ ) are shown. DAT, days after treatment

**Figure S3** Number of differentially expressed genes ( $FDR \leq 0.001$  and  $\log_2(FPKM_{\text{treatment}}/FPKM_{\text{control}}) \geq 1$  or  $\leq -1$ ) between control and GA<sub>3</sub>-treated female flowers and receptacles. DAT, days after treatment

**Figure S4** Heat maps of hormone-related genes with low expression. FPKM of all samples was  $< 10$

**Figure S1**

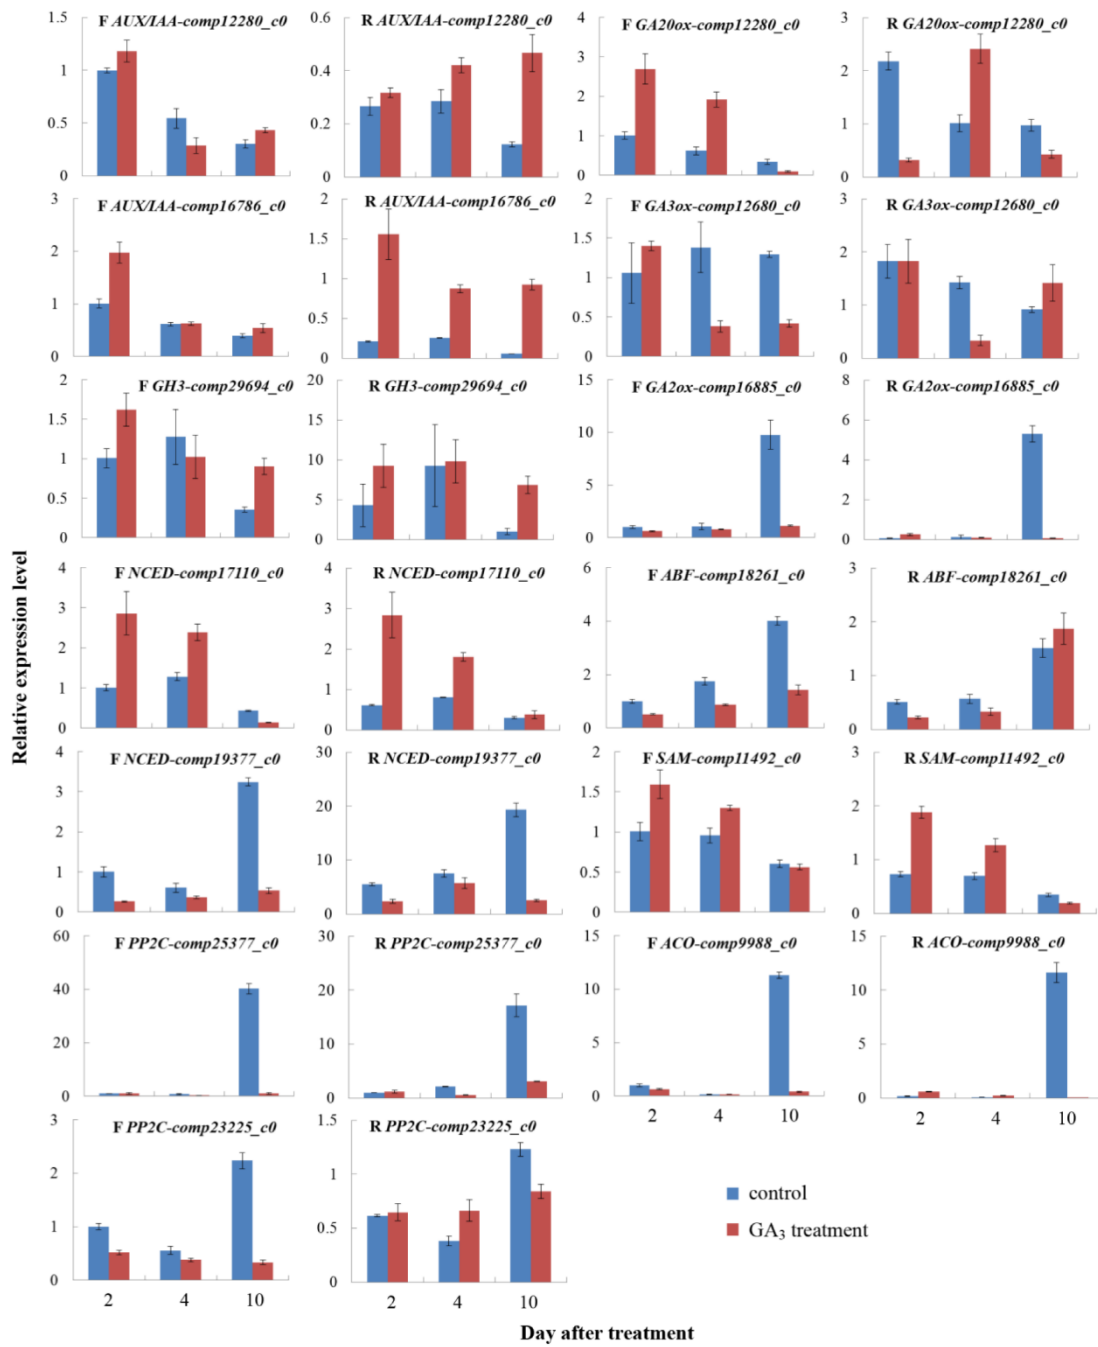

**Figure S2**

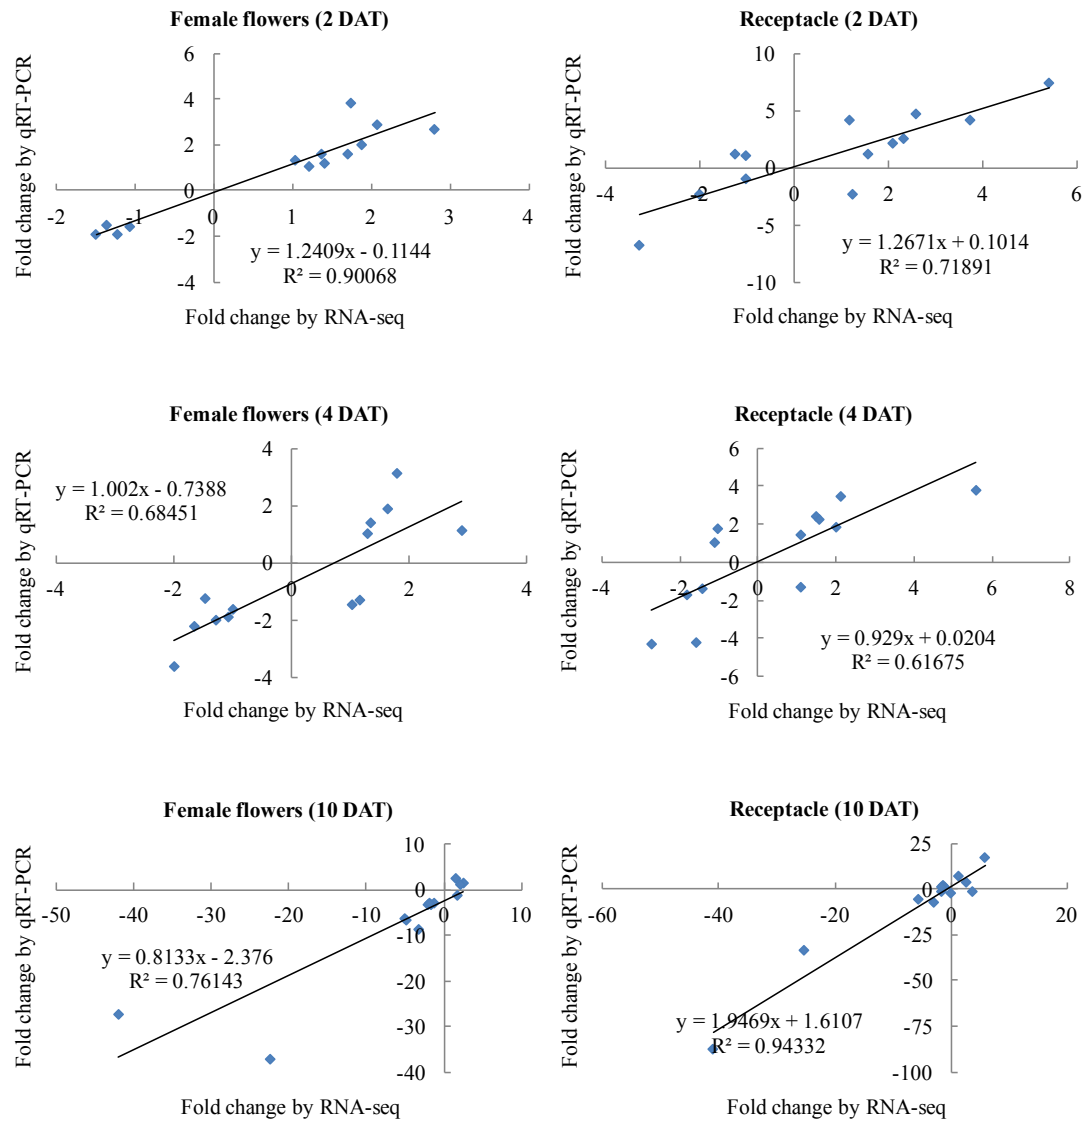

**Figure S3**

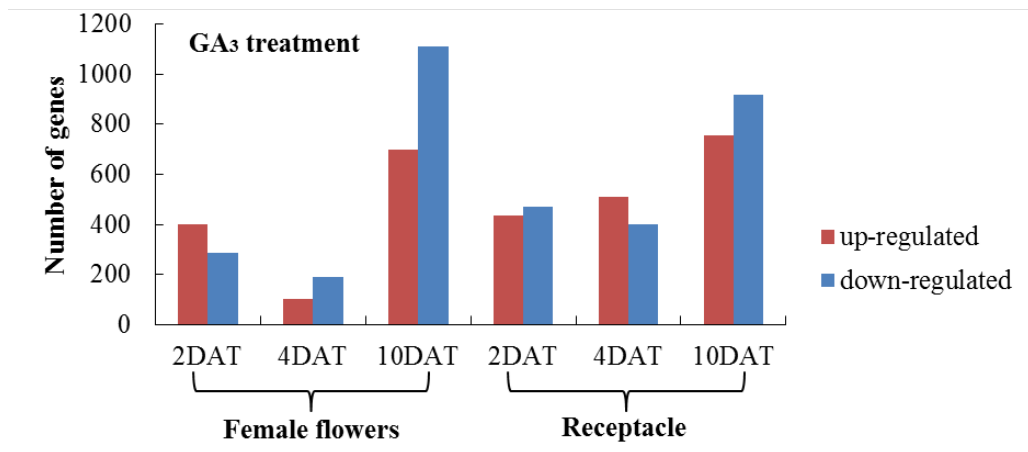



Figure S4

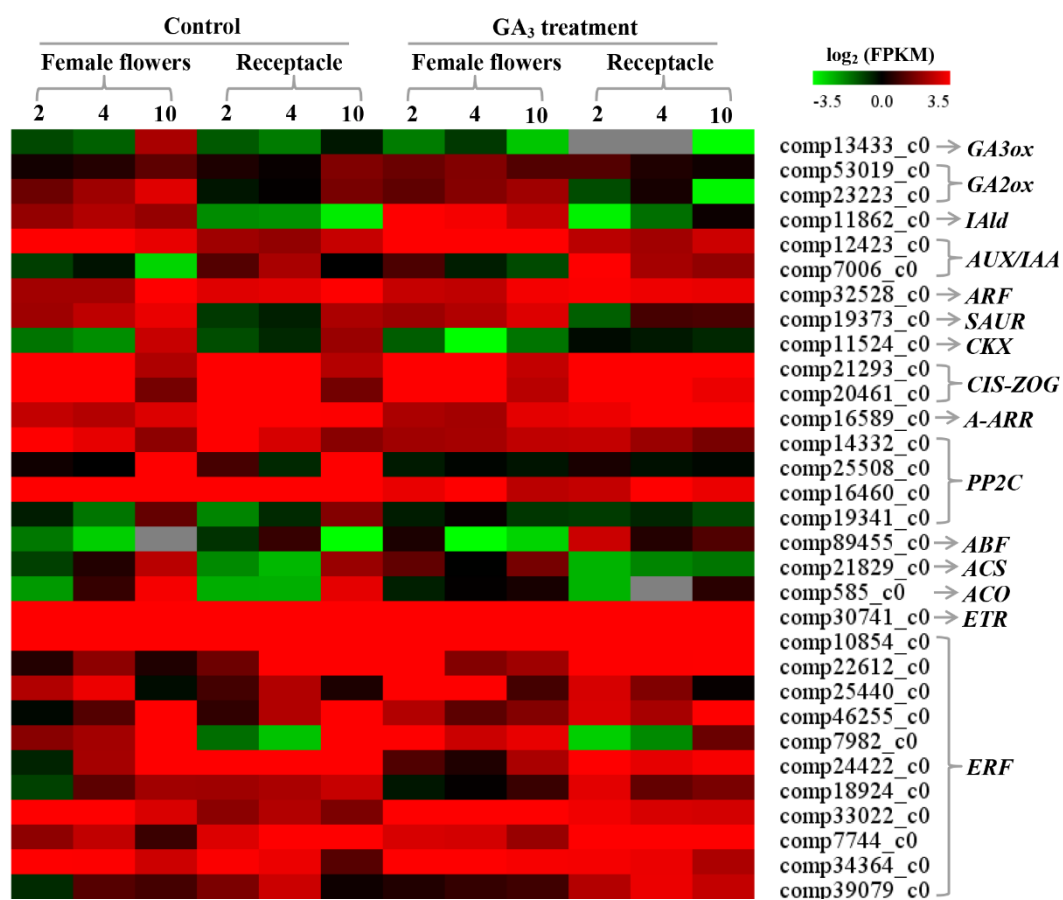

Supplement: 12870_2018_1318_MOESM1_ESM.pdf [file 12870_2018_1318_MOESM1_ESM.pdf]
